# Supplementary material for: A Combined Experimental/Computational Study of Dicationic Ionic Liquids with Bromide and Tungstate Anions
Source: MDPI journal article supplement (doi:10.3390/molecules29092131), 2024-05-03
Supplement: s1 [file s1]

# A Combined Experimental/Computational Study of Dicationic Ionic Liquids with Bromide and Tungstate Anions

Guelber Cardoso Gomes <sup>1,†</sup>, Claudio Ferdeghini <sup>1,†</sup>, Luca Guglielmero <sup>2,\*</sup>, Felicia D'Andrea <sup>1</sup>, Lorenzo Guazzelli <sup>1</sup>, Andrea Mezzetta <sup>1</sup> and Christian Silvio Pomelli <sup>1,\*</sup>

<sup>1</sup> Department of Pharmacy, University of Pisa, Via Bonanno 33, 56126 Pisa, Italy; guelbercardoso@gmail.com (G.C.G.); claudioferdeghini@gmail.com (C.F.); felicia.dandrea@unipi.it (F.D.); lorenzo.guazzelli@unipi.it (L.G.); andrea.mezzetta@unipi.it (A.M.)

<sup>2</sup> Classe di Scienze, Scuola Normale Superiore, Piazza dei Cavalieri 7, 56126 Pisa, Italy

\* Correspondence: luca.guglielmero@sns.it (L.G.); christian.pomelli@unipi.it (C.S.P.)

† These authors contributed equally to this work.

## *Supporting Information*

### *Table of Contents*

|                                                                            |               |
|----------------------------------------------------------------------------|---------------|
| <sup>1</sup> H-NMR and <sup>13</sup> C-NMR spectra of compounds <b>1-6</b> | pages S2-S7   |
| ATR-FTIR spectra of compounds <b>1-6</b>                                   | pages S8-S11  |
| TGA profiles of compounds <b>1-6</b>                                       | pages S12-S14 |
| Energy profile for molecular dynamics                                      | page S15      |
| HOMO and LUMO orbitals for <b>1-3</b>                                      | pages S15-S17 |
| Structures of WO <sub>4</sub> <sup>2-</sup> +CO <sub>2</sub> clusters      | pages S18-S19 |

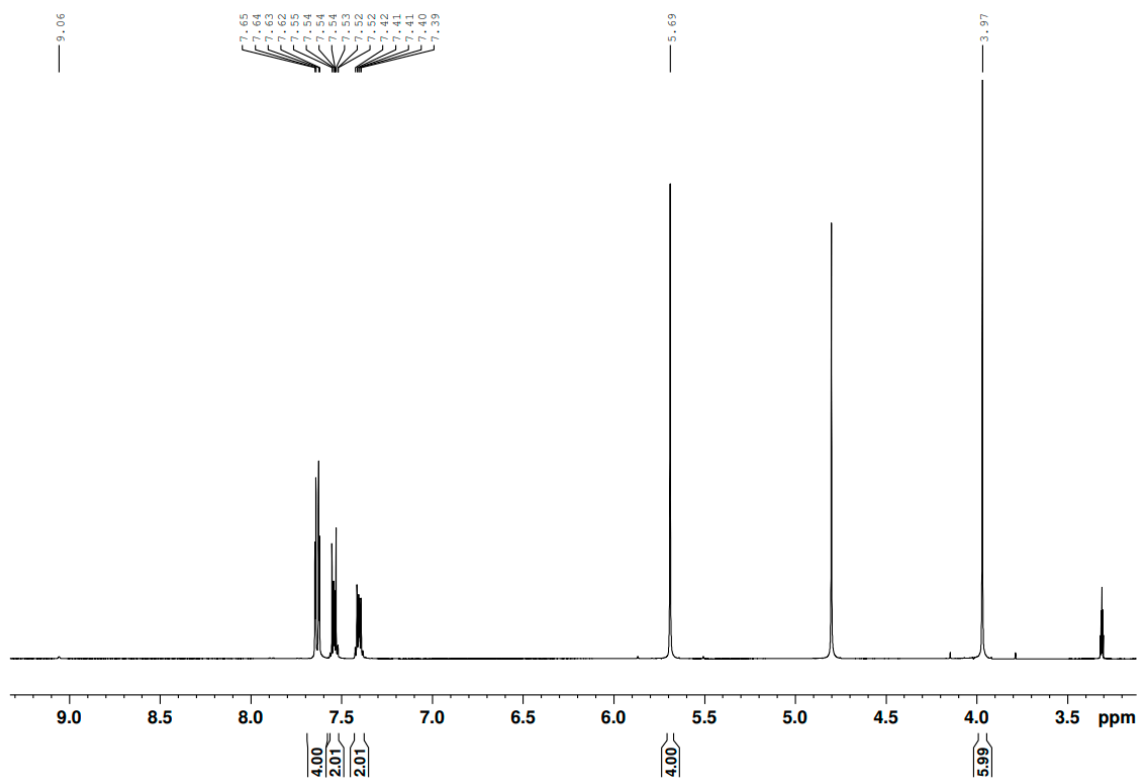

**Figure S1.** <sup>1</sup>H-NMR spectrum of 1,1'-(1,2-phenylenebis(methylene))bis(3-methylimidazolium) bromide (1).

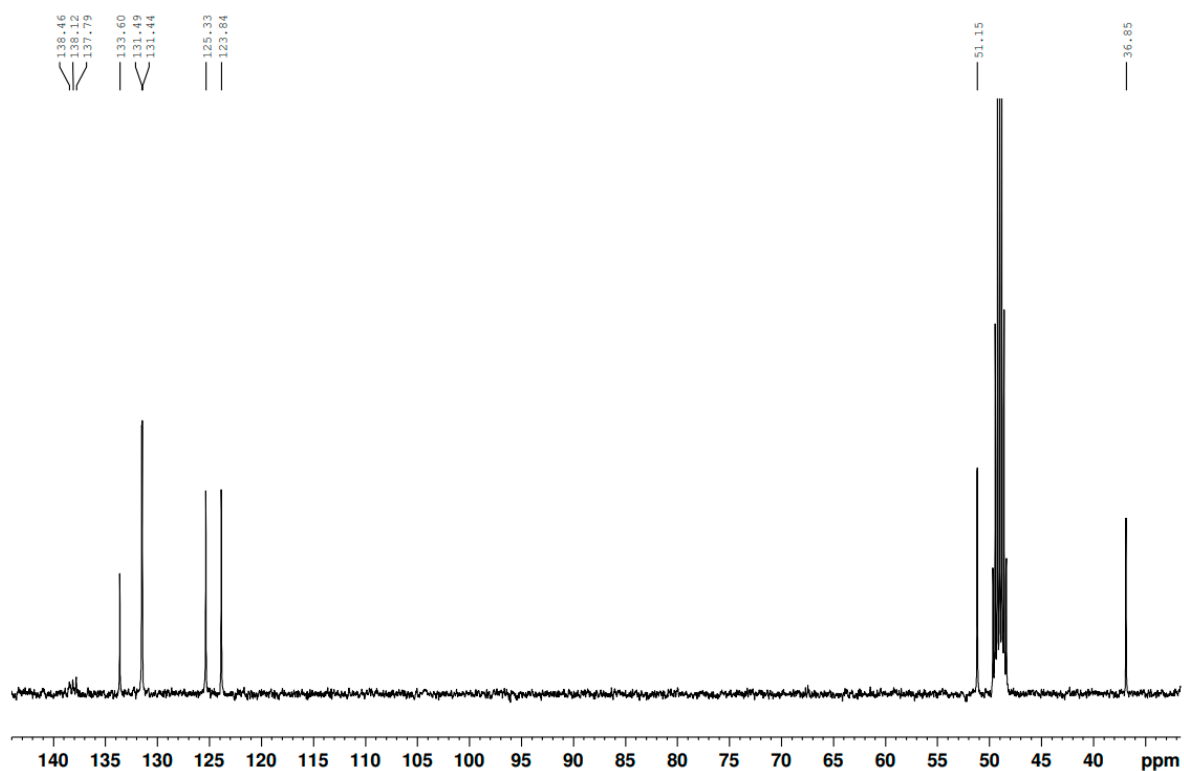

**Figure S2.** <sup>13</sup>C-NMR spectrum of 1,1'-(1,2-phenylenebis(methylene))bis(3-methylimidazolium) bromide (1).

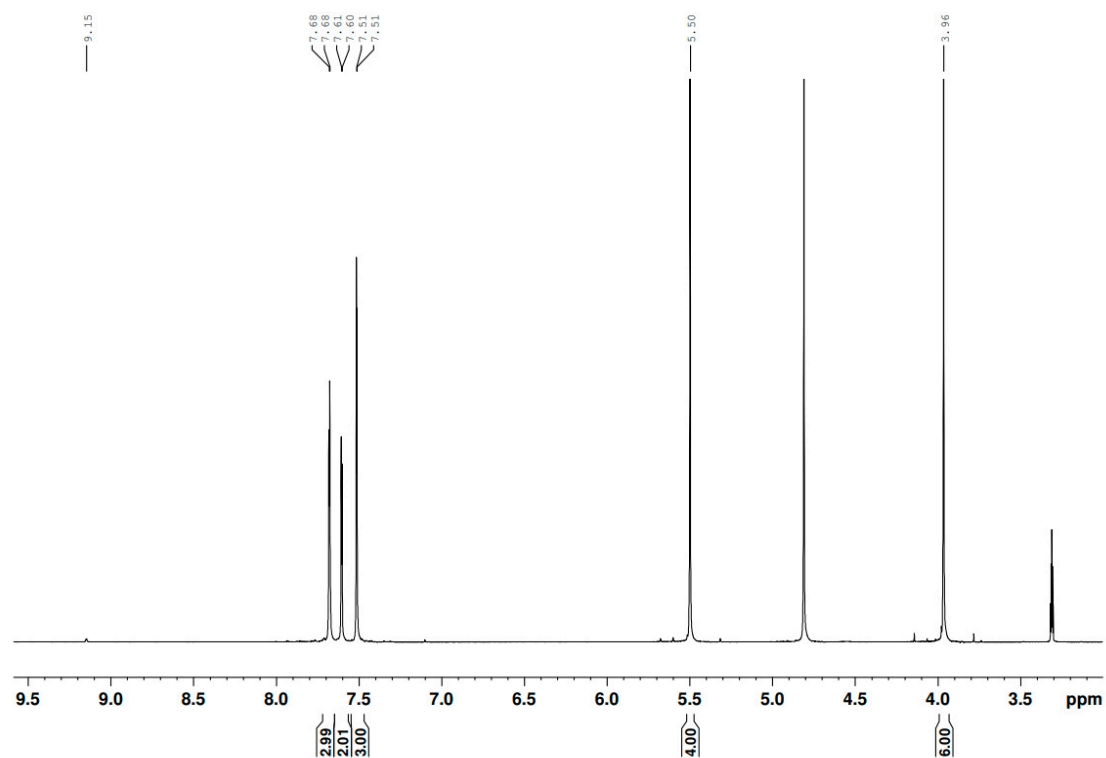

**Figure S3.** <sup>1</sup>H-NMR spectrum of 1,1'-(1,3-phenylenebis(methylene))bis(3-methylimidazolium) bromide (2).

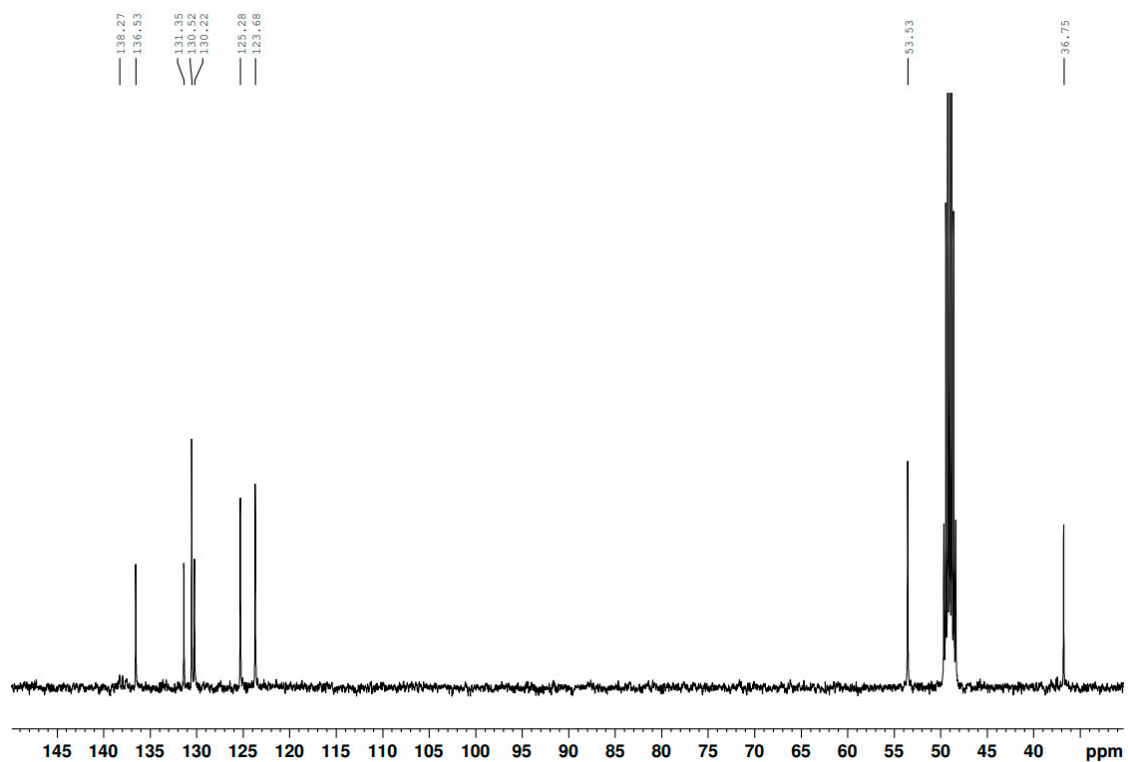

**Figure S4.** <sup>13</sup>C-NMR spectrum of 1,1'-(1,3-phenylenebis(methylene))bis(3-methylimidazolium) bromide (2).

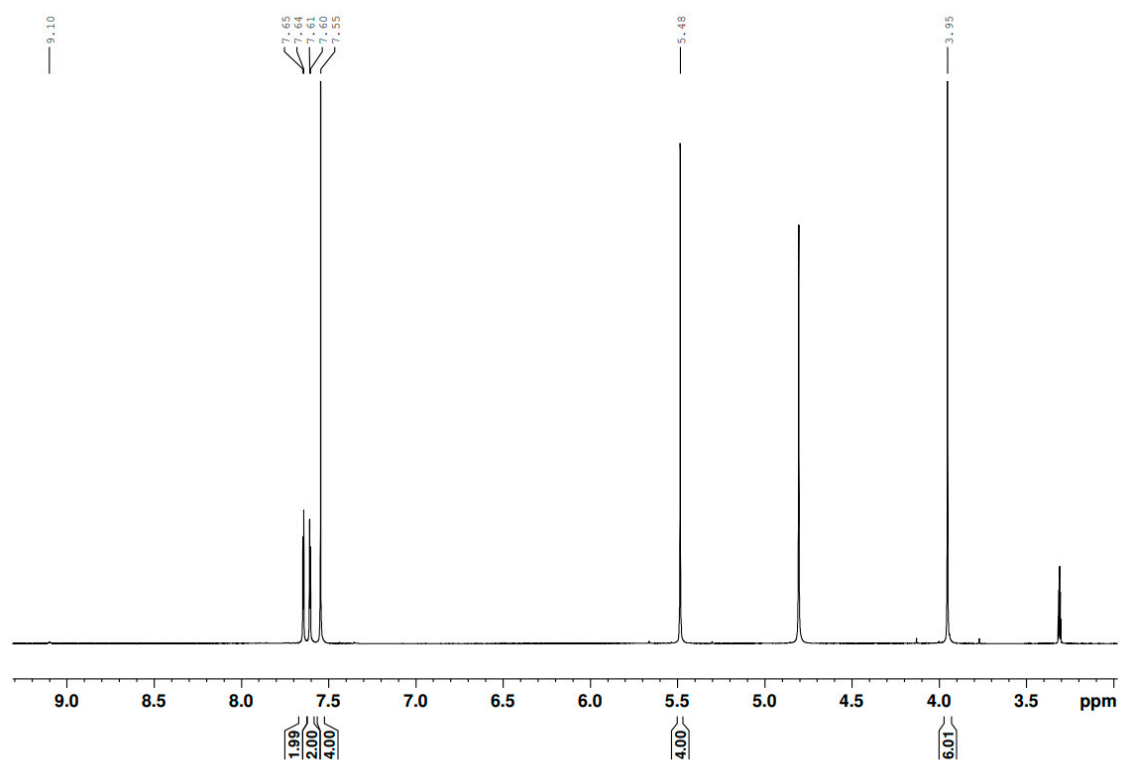

**Figure S5.** <sup>1</sup>H-NMR spectrum of 1,1'-(1,4-phenylenebis(methylene))bis(3-methylimidazolium) bromide (3).

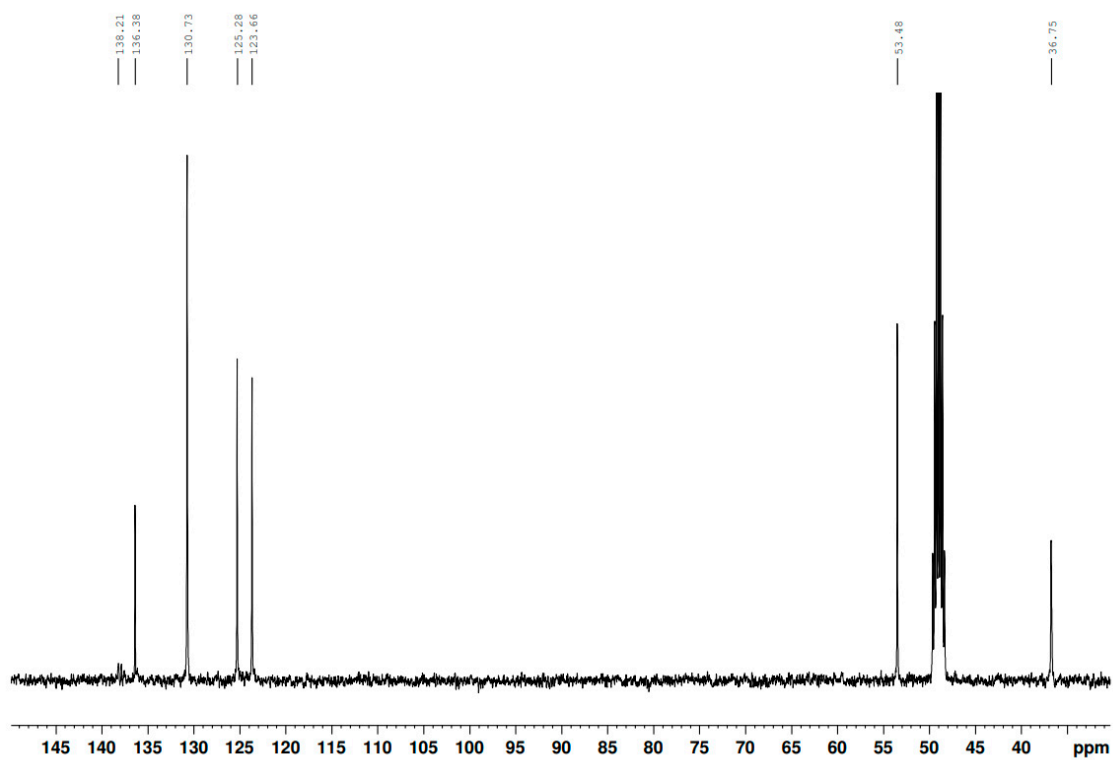

**Figure S6.** <sup>13</sup>C-NMR spectrum of 1,1'-(1,4-phenylenebis(methylene))bis(3-methylimidazolium) bromide (3).

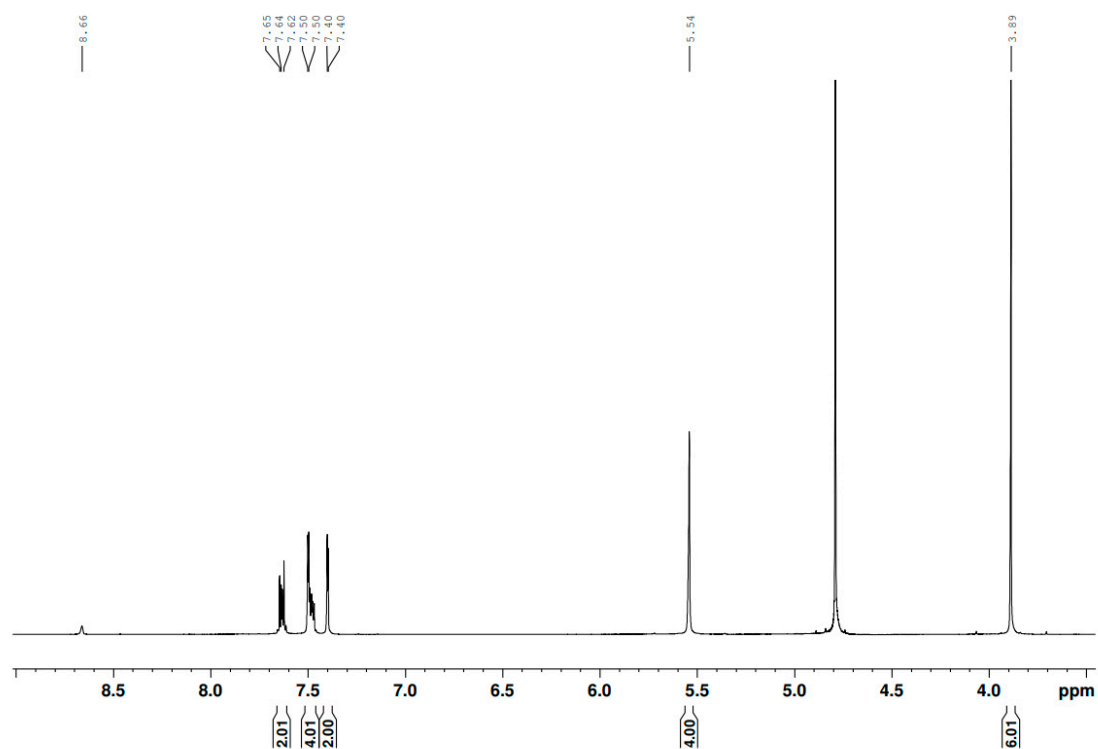

**Figure S7.** <sup>1</sup>H-NMR spectrum of 1,1'-(1,2-phenylenebis(methylene))bis(3-methylimidazolium) tungstate (**4**).

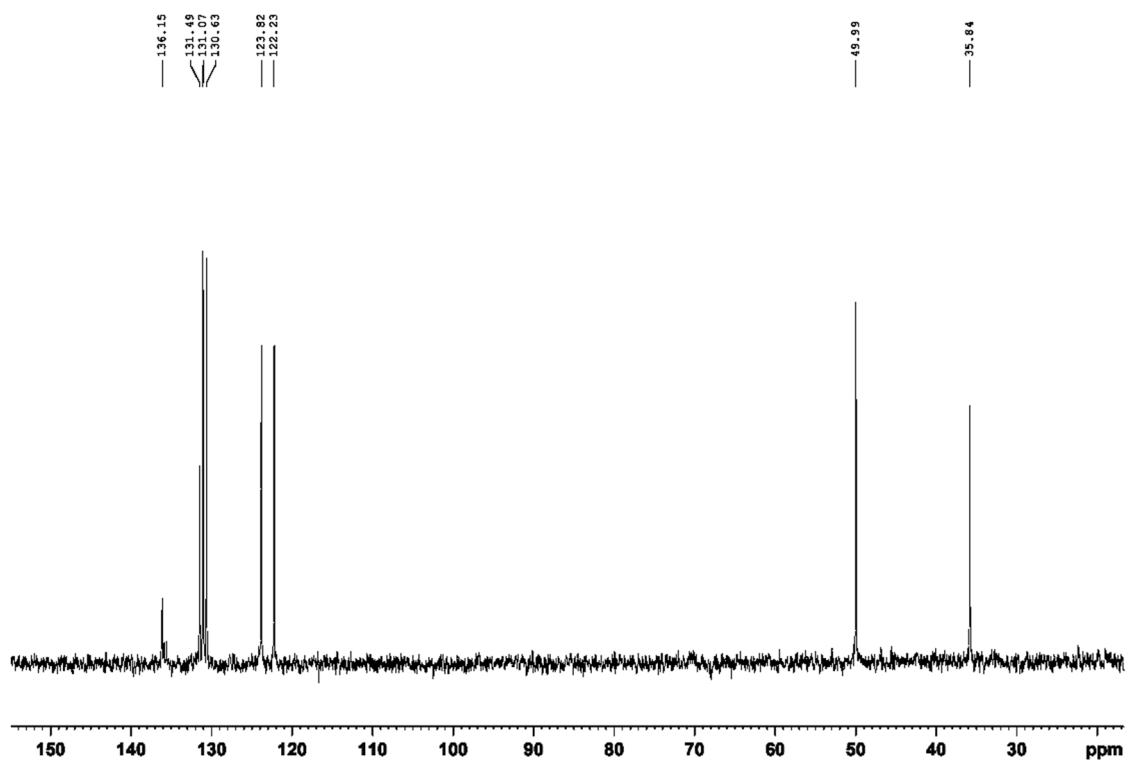

**Figure S8.** <sup>13</sup>C-NMR spectrum of 1,1'-(1,2-phenylenebis(methylene))bis(3-methylimidazolium) tungstate (**4**).

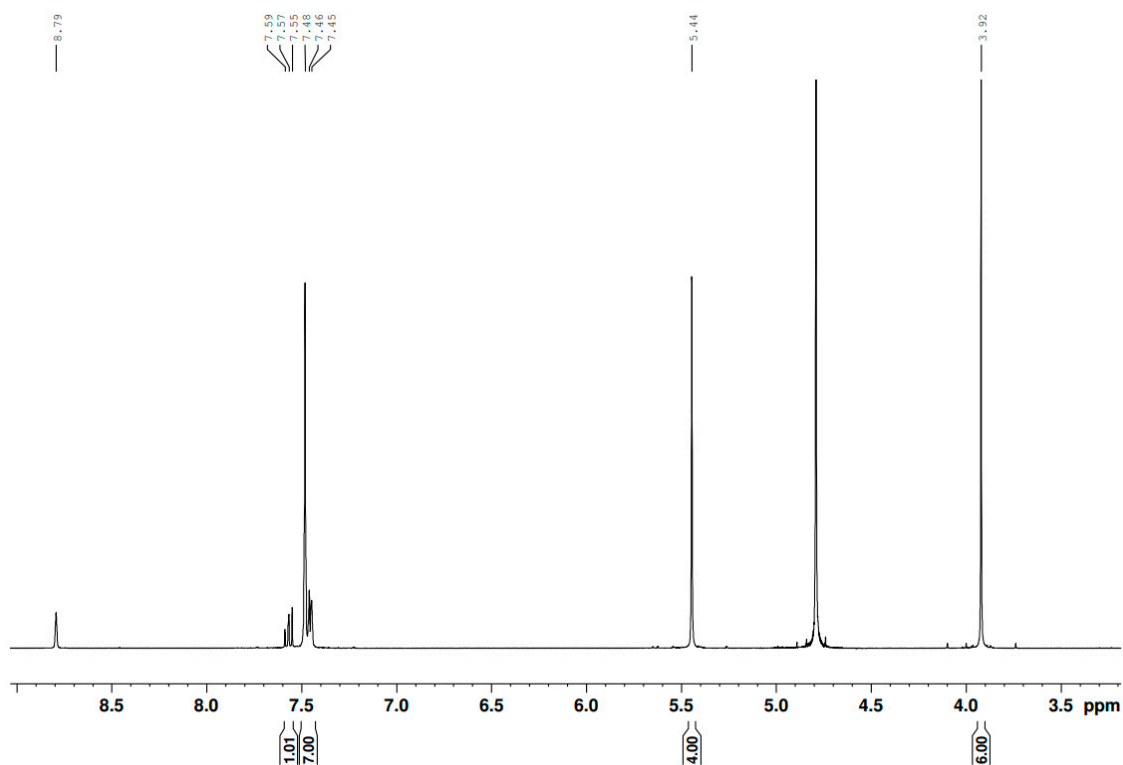

**Figure S9.** <sup>1</sup>H-NMR spectrum of 1,1'-(1,3-phenylenebis(methylene))bis(3-methylimidazolium) tungstate (5).

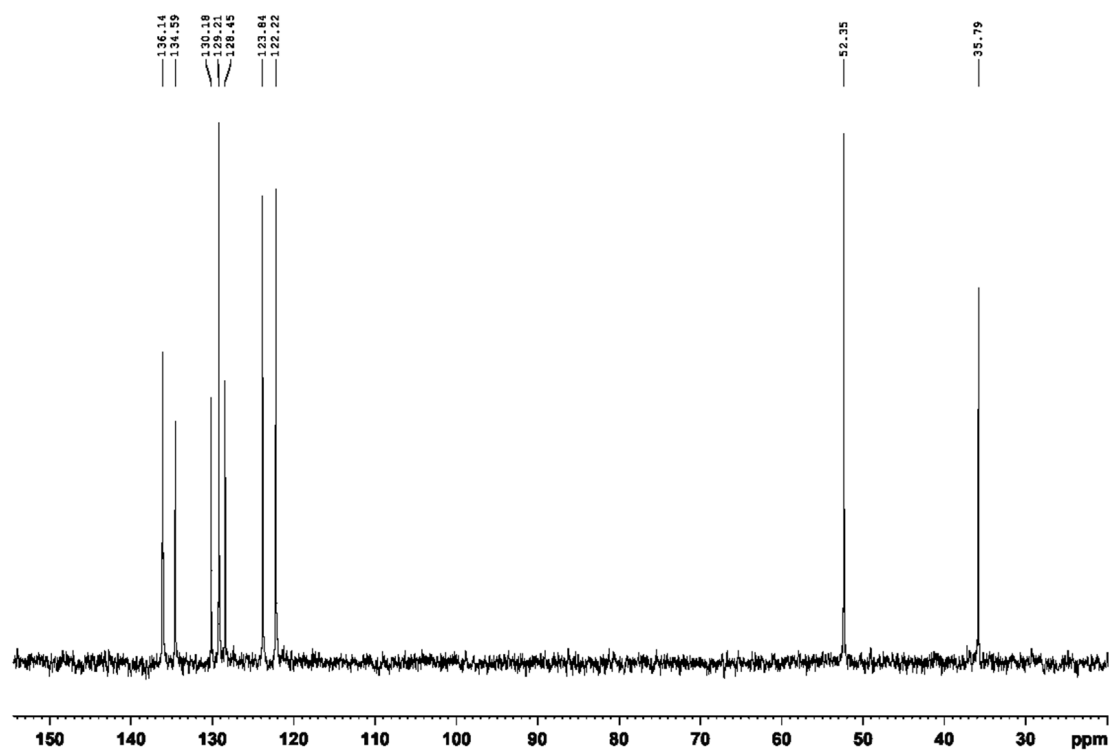

**Figure S10.** <sup>13</sup>C-NMR spectrum of 1,1'-(1,3-phenylenebis(methylene))bis(3-methylimidazolium) tungstate (5).

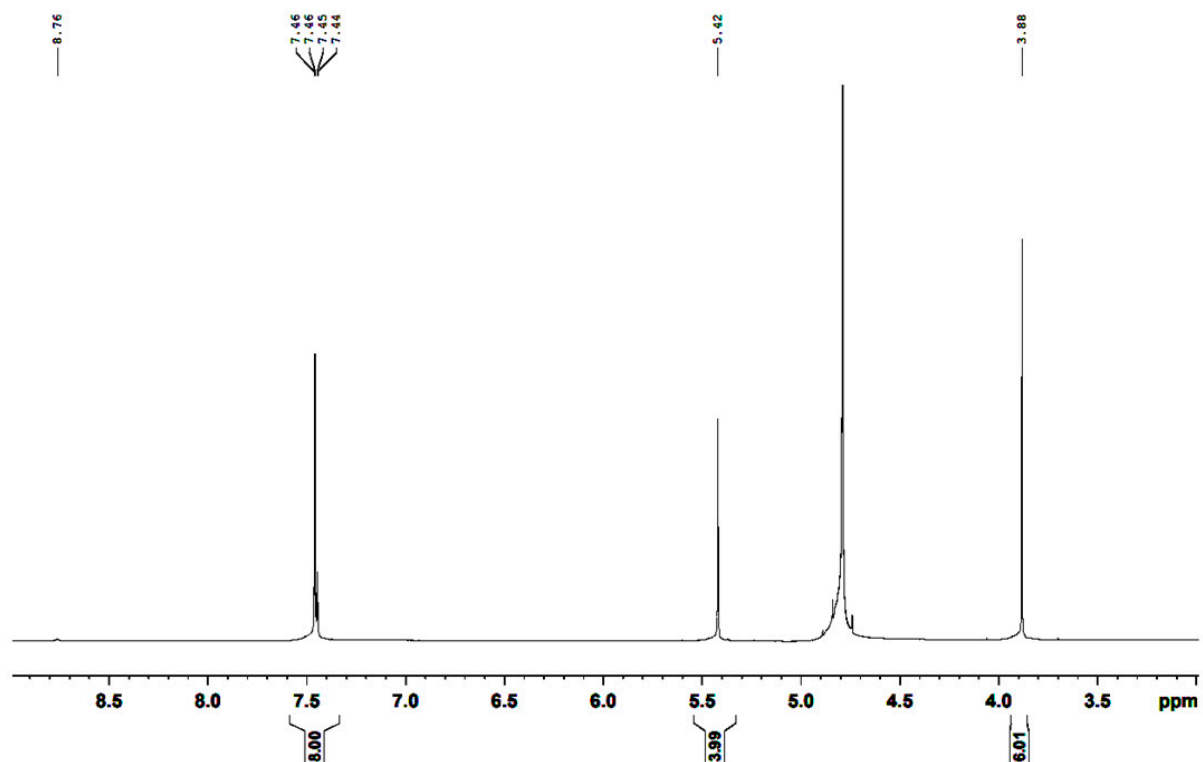

**Figure S11.**  $^1\text{H}$ -NMR spectrum of 1,1'-(1,4-phenylenebis(methylene))bis(3-methylimidazolium) tungstate (6).

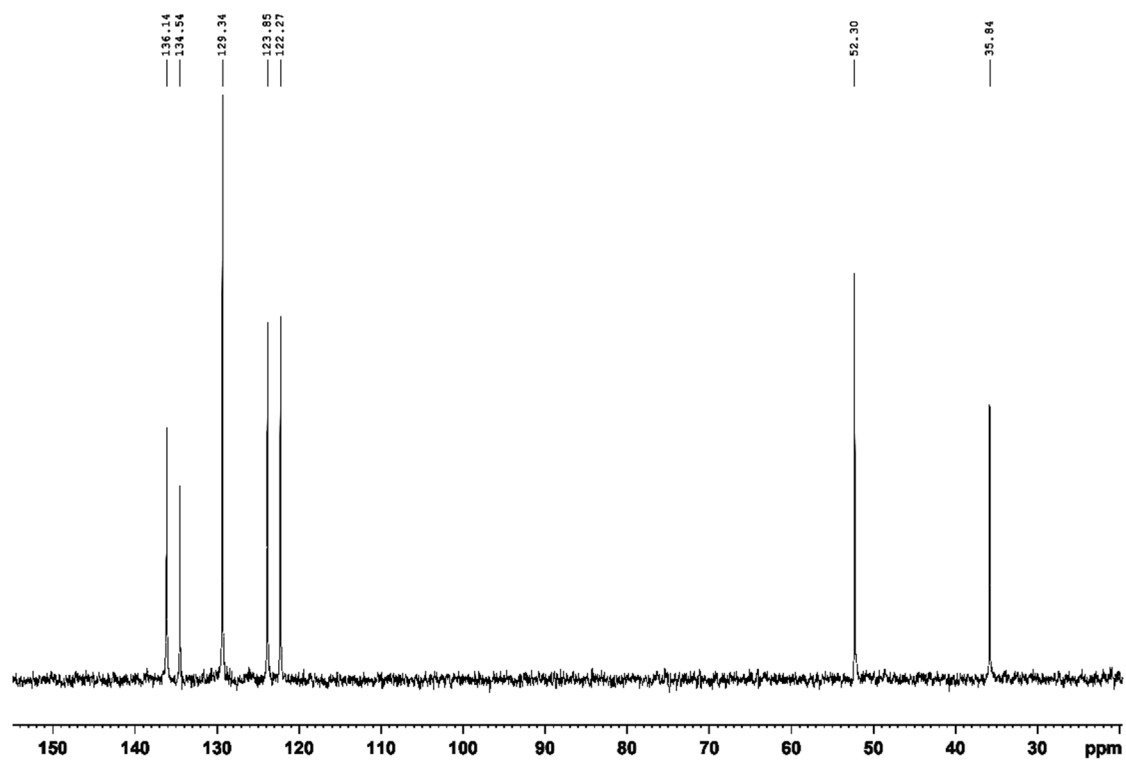

**Figure S12.**  $^{13}\text{C}$ -NMR spectrum of 1,1'-(1,4-phenylenebis(methylene))bis(3-methylimidazolium) tungstate (6).

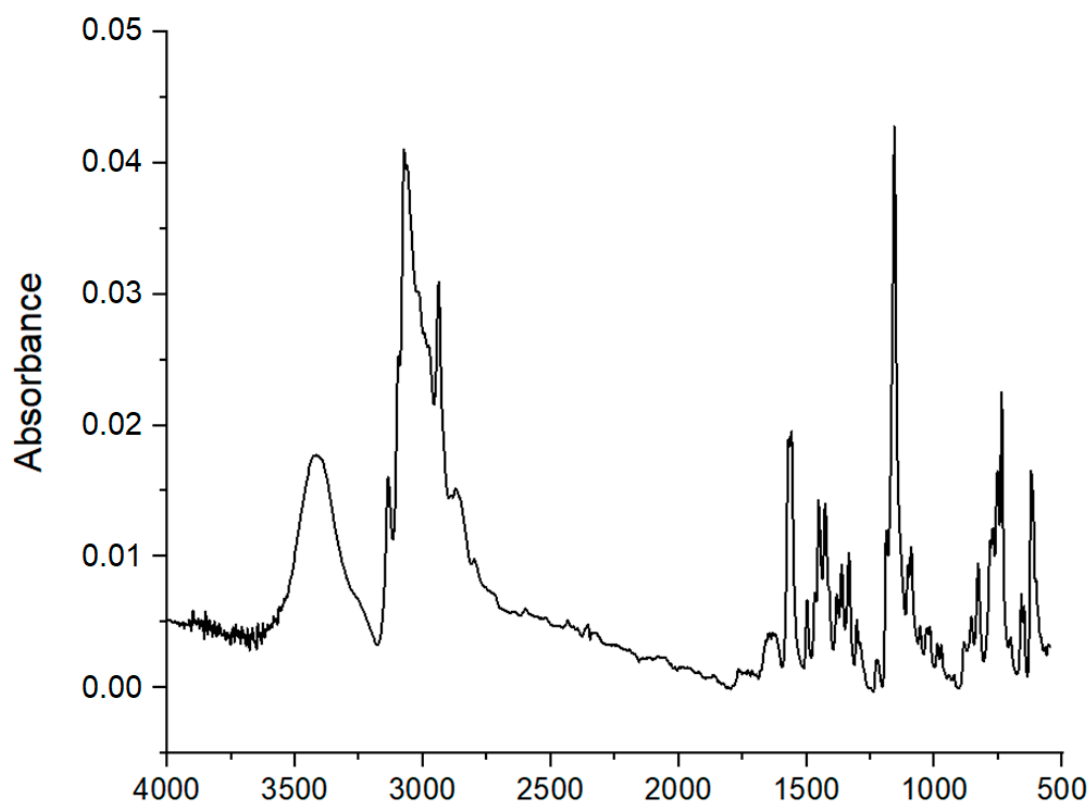

**Figure S13.** ATR-FTIR spectrum of 1,1'-(1,2-phenylenebis(methylene))bis(3-methylimidazolium) bromide (**1**).

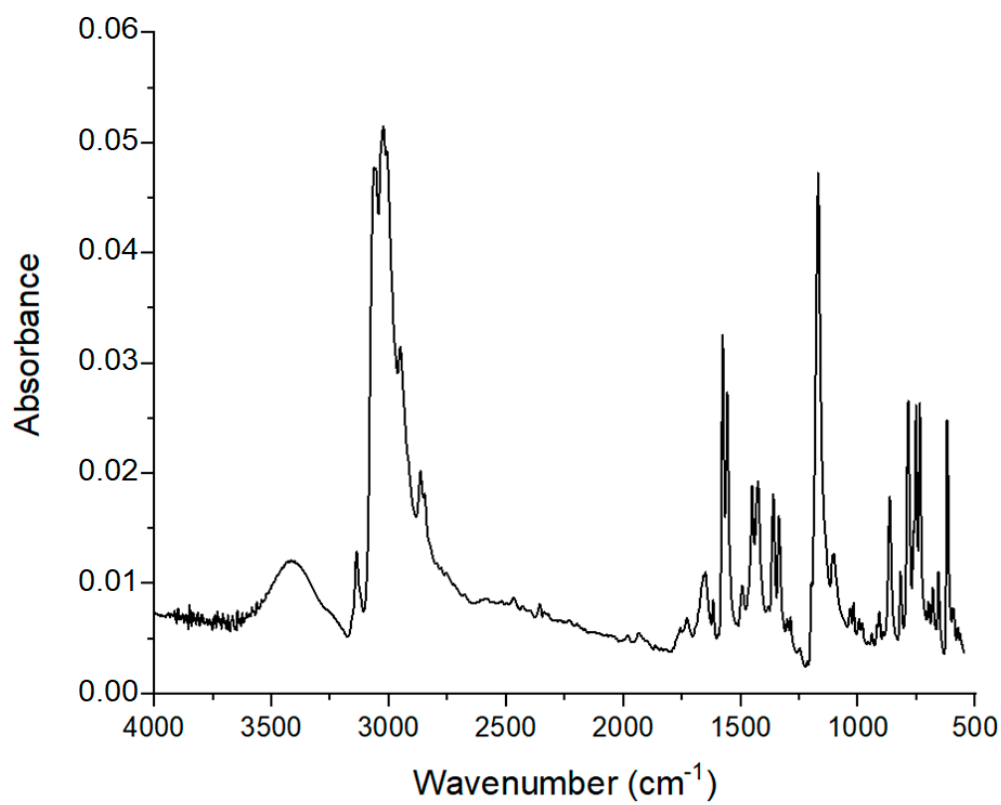

**Figure S14.** ATR-FTIR spectrum of 1,1'-(1,3-phenylenebis(methylene))bis(3-methylimidazolium) bromide (**2**).



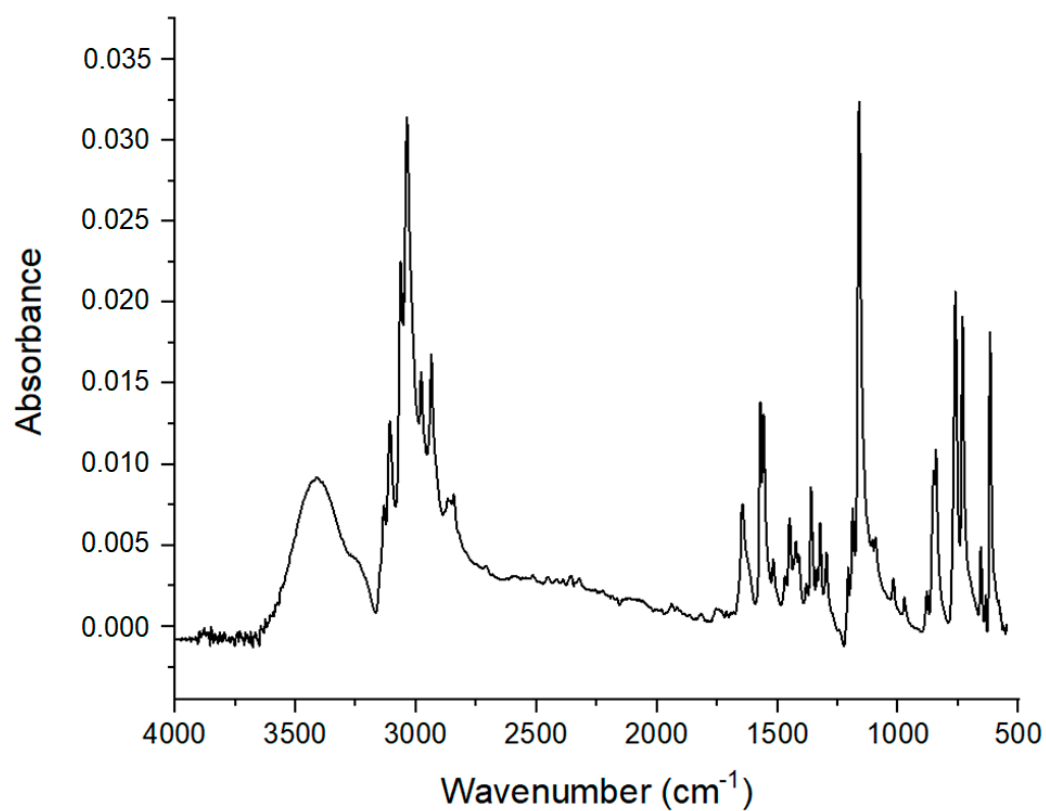

**Figure S15.** ATR-FTIR spectrum of 1,1'-(1,4-phenylenebis(methylene))bis(3-methylimidazolium) bromide (**3**).

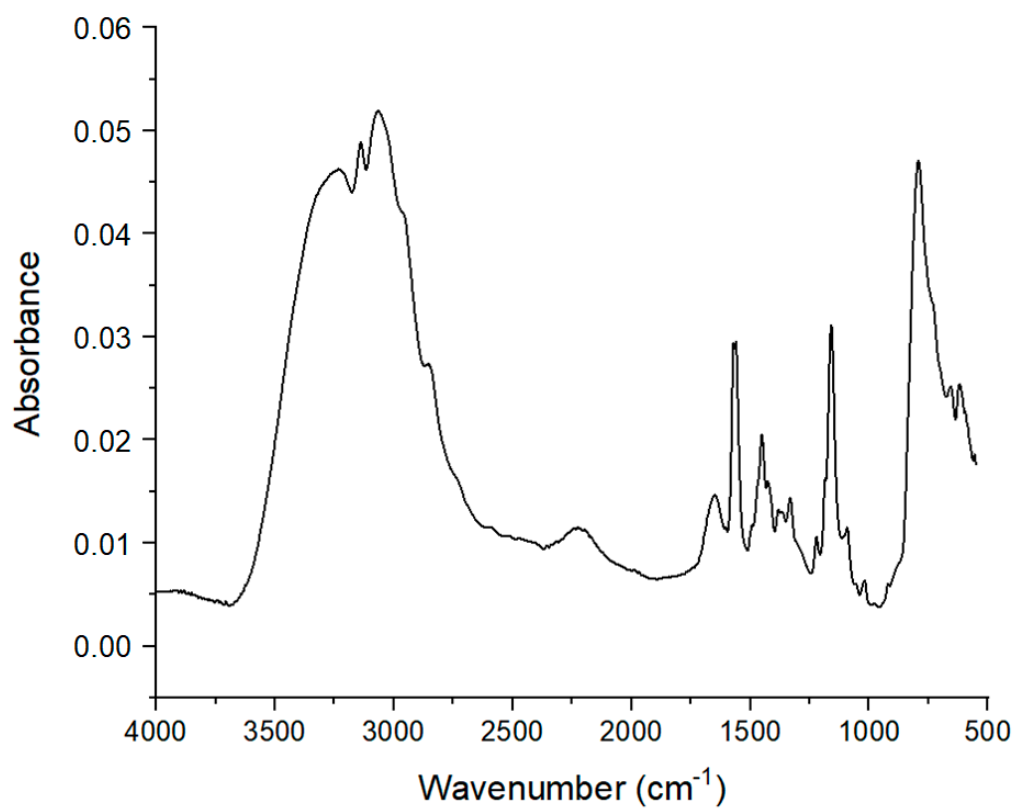

**Figure S16.** ATR-FTIR spectrum of 1,1'-(1,2-phenylenebis(methylene))bis(3-methylimidazolium) tungstate (**4**).

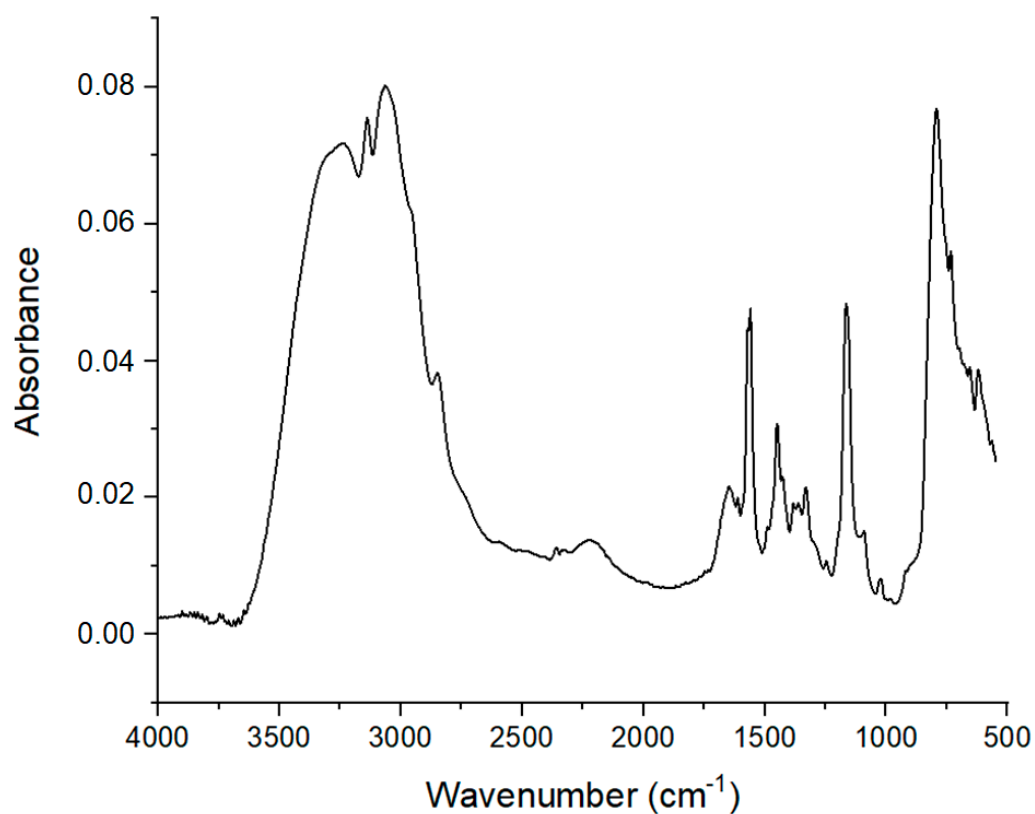

**Figure S17.** ATR-FTIR spectrum of 1,1'-(1,3-phenylenebis(methylene))bis(3-methylimidazolium) tungstate (5).

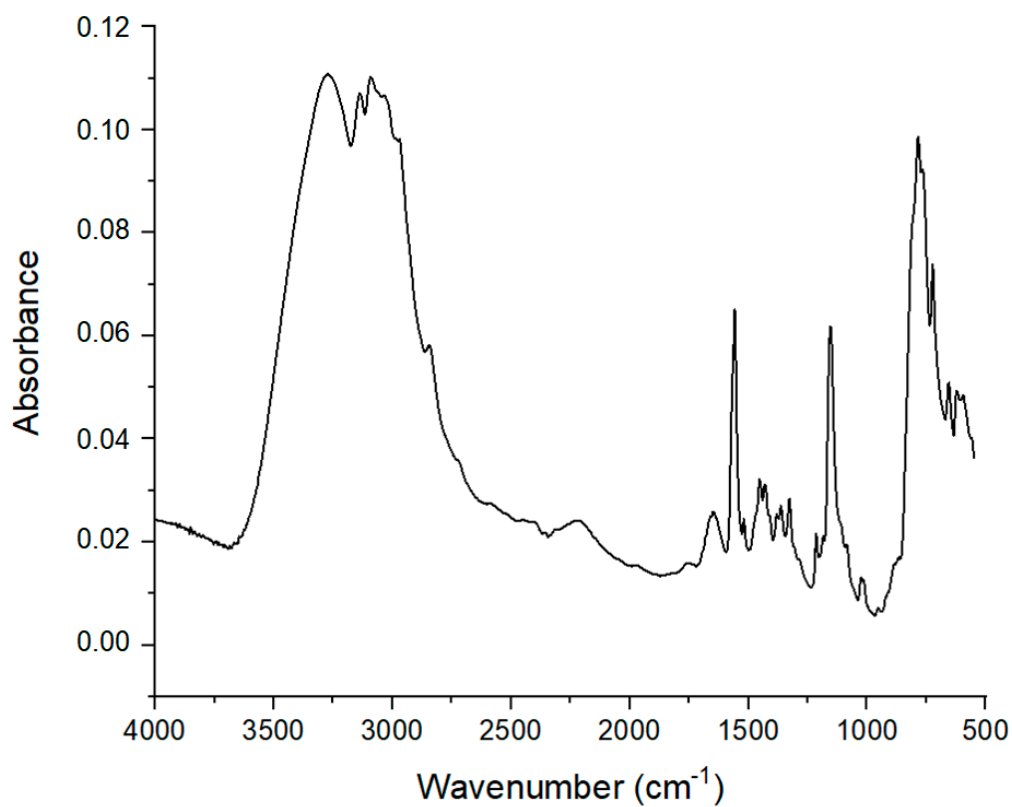

**Figure S18.** ATR-FTIR spectrum of 1,1'-(1,4-phenylenebis(methylene))bis(3-methylimidazolium) tungstate (6).

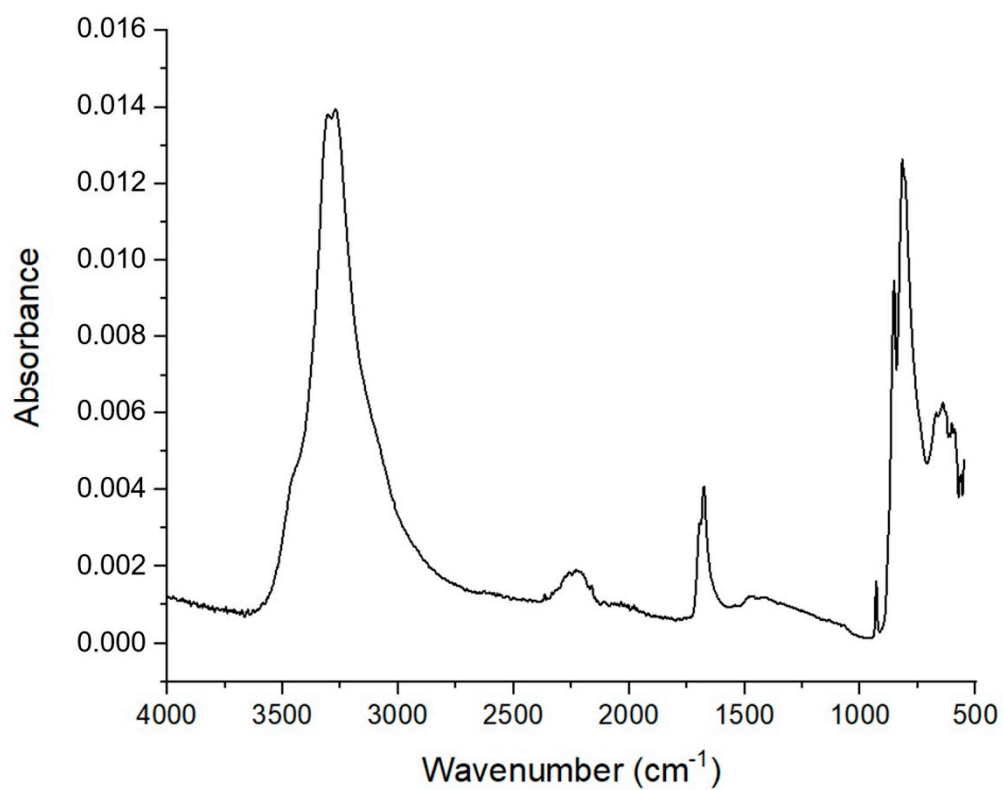

**Figure S19.** ATR-FTIR spectrum of sodium tungstate.

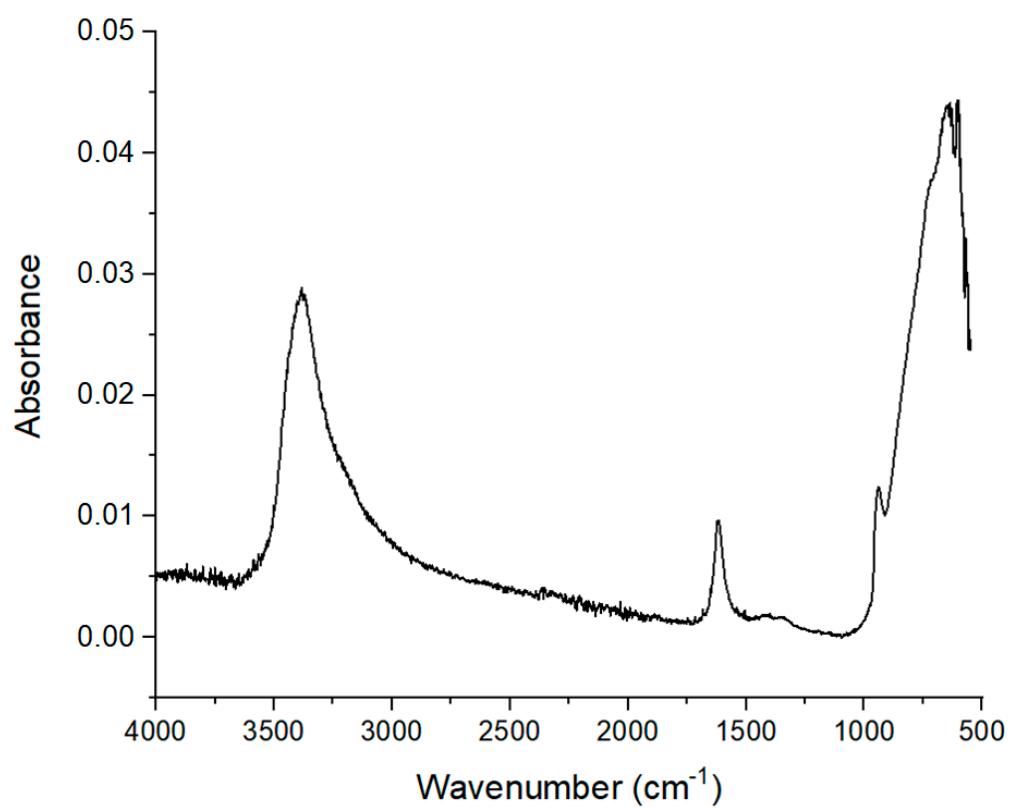

**Figure S20.** ATR-FTIR spectrum of tungstic acid.

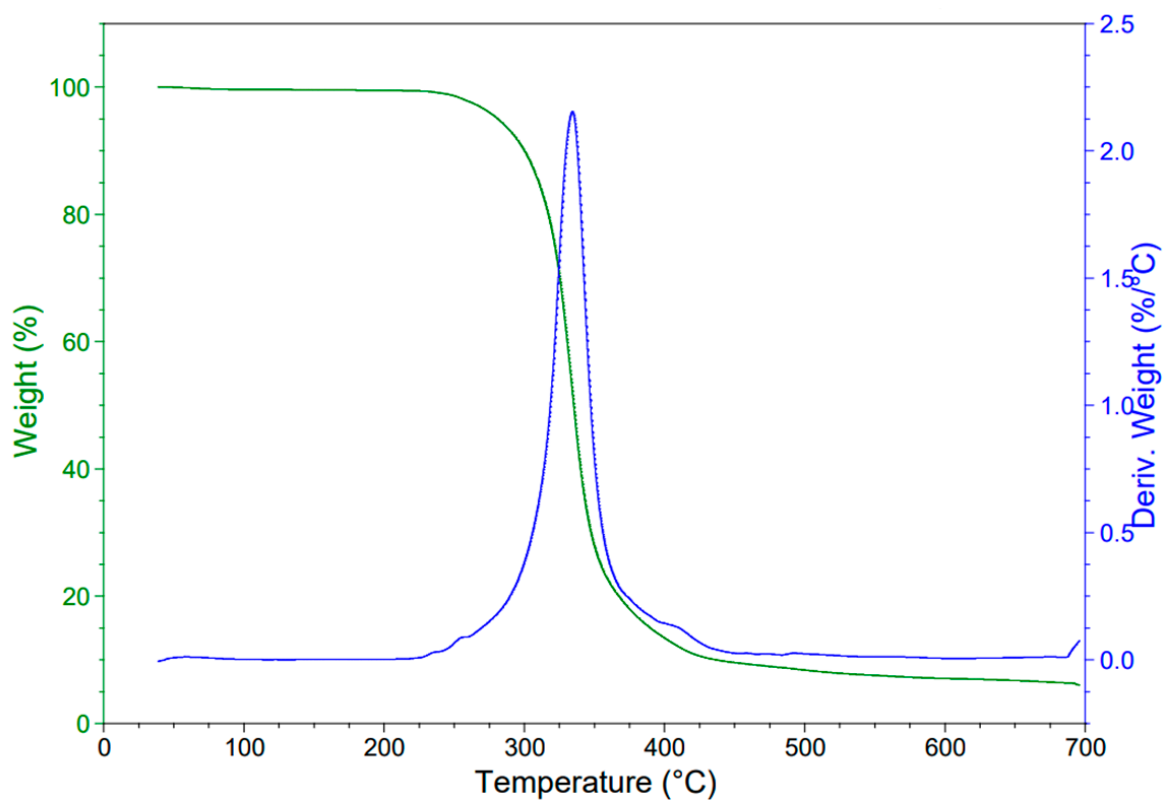

**Figure S21.** Thermal gravimetric analysis and derivative of 1,1'-(1,2-phenylenebis(methylene))bis(3-methylimidazolium) bromide (**1**)

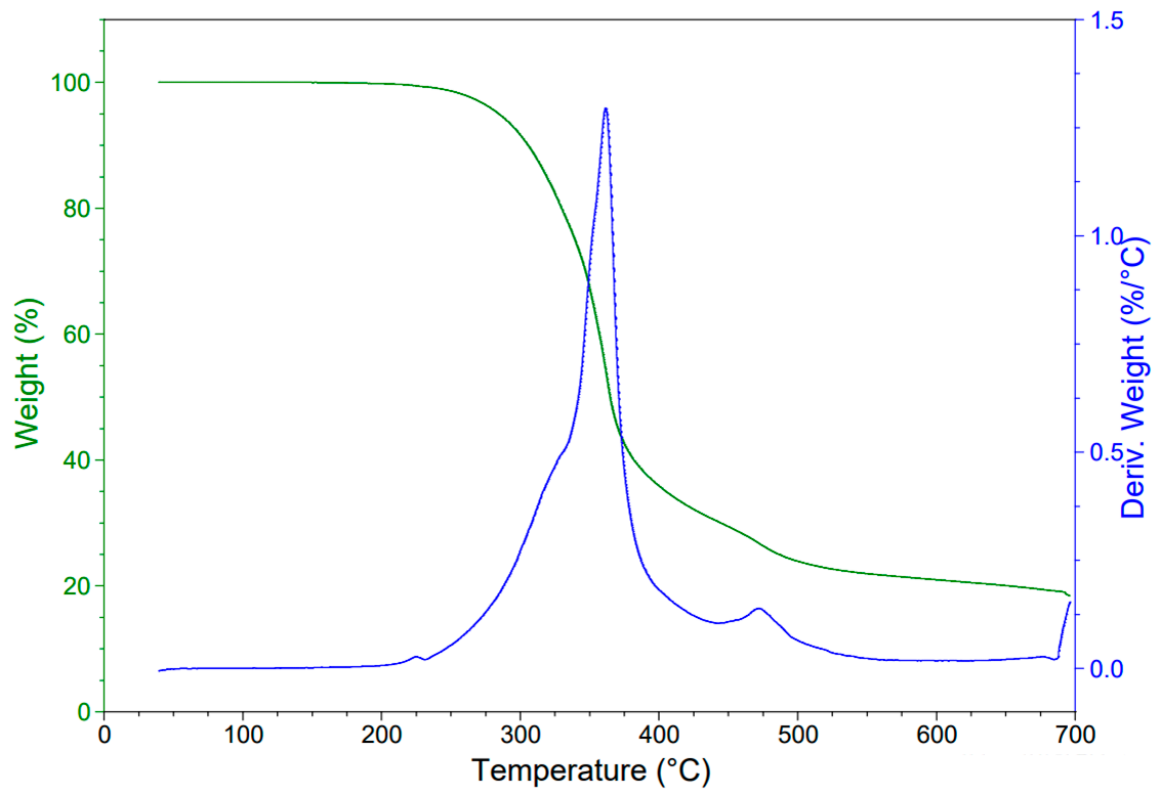

**Figure S22.** Thermal gravimetric analysis and derivative of 1,1'-(1,3-phenylenebis(methylene))bis(3-methylimidazolium) bromide (**2**)

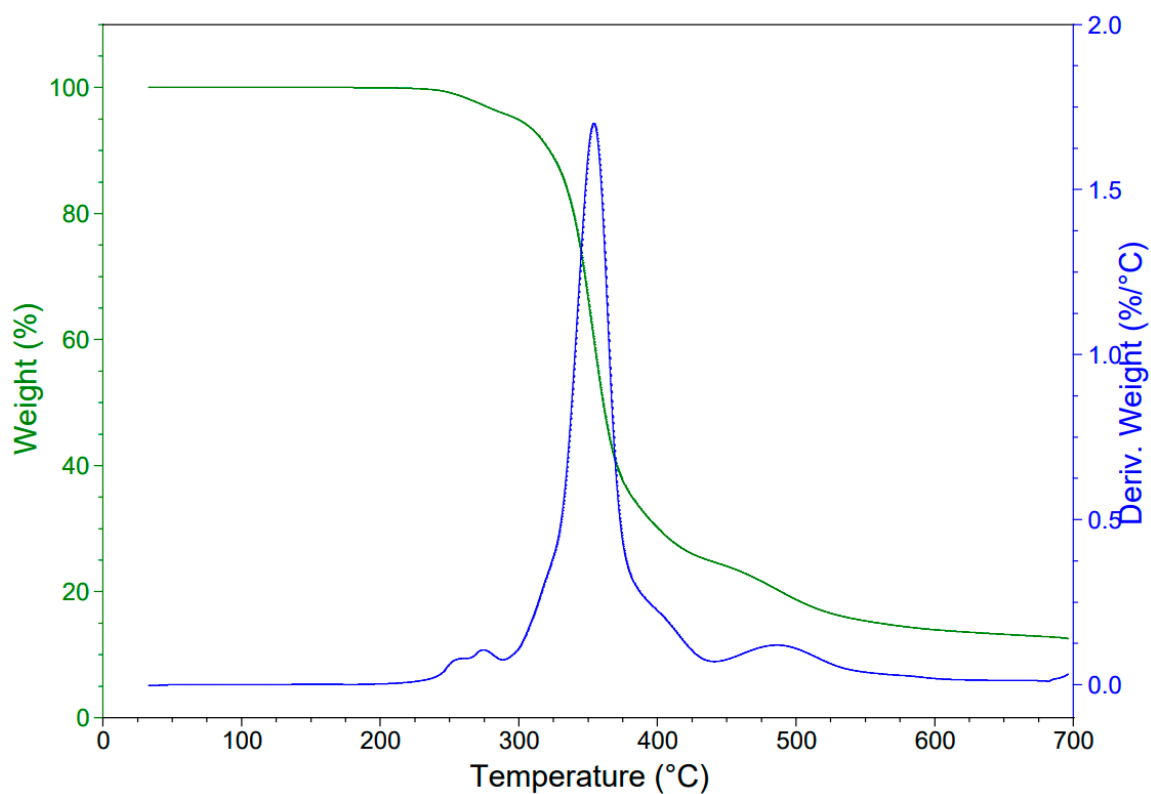

**Figure S23.** Thermal gravimetric analysis and derivative of 1,1'-(1,4-phenylenebis(methylene))bis(3-methylimidazolium) bromide (**3**)

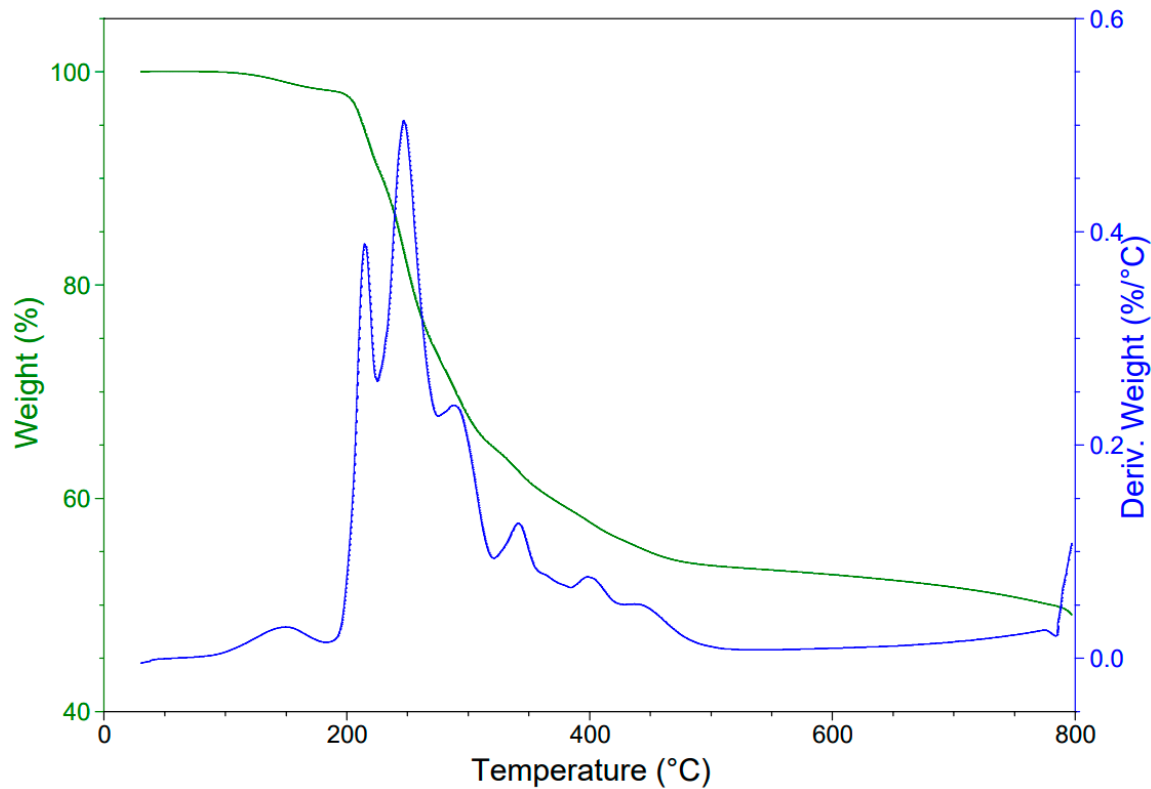

**Figure S24.** Thermal gravimetric analysis and derivative of 1,1'-(1,2-phenylenebis(methylene))bis(3-methylimidazolium) tungstate (**4**).

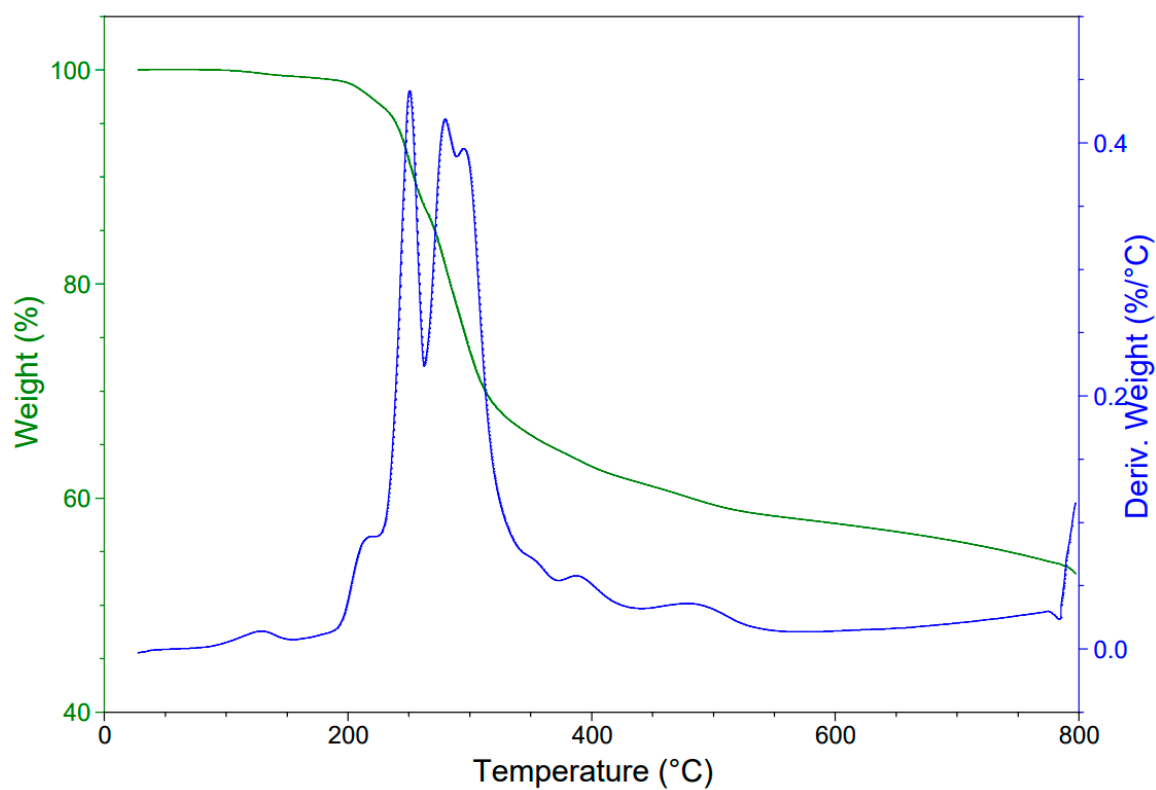

**Figure S25.** Thermal gravimetric analysis and derivative of 1,1'-(1,3-phenylenebis(methylene))bis(3-methylimidazolium) tungstate (**5**).

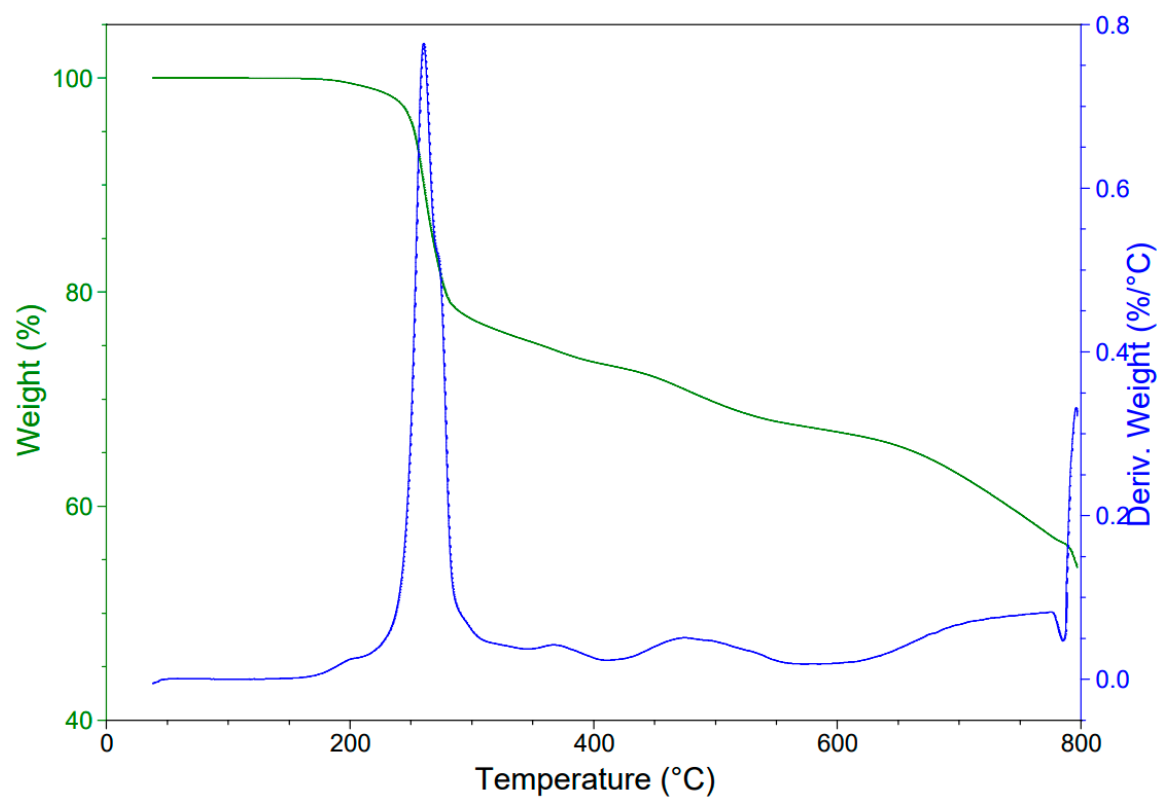

**Figure S26.** Thermal gravimetric analysis and derivative of 1,1'-(1,4-phenylenebis(methylene))bis(3-methylimidazolium) tungstate (**6**).

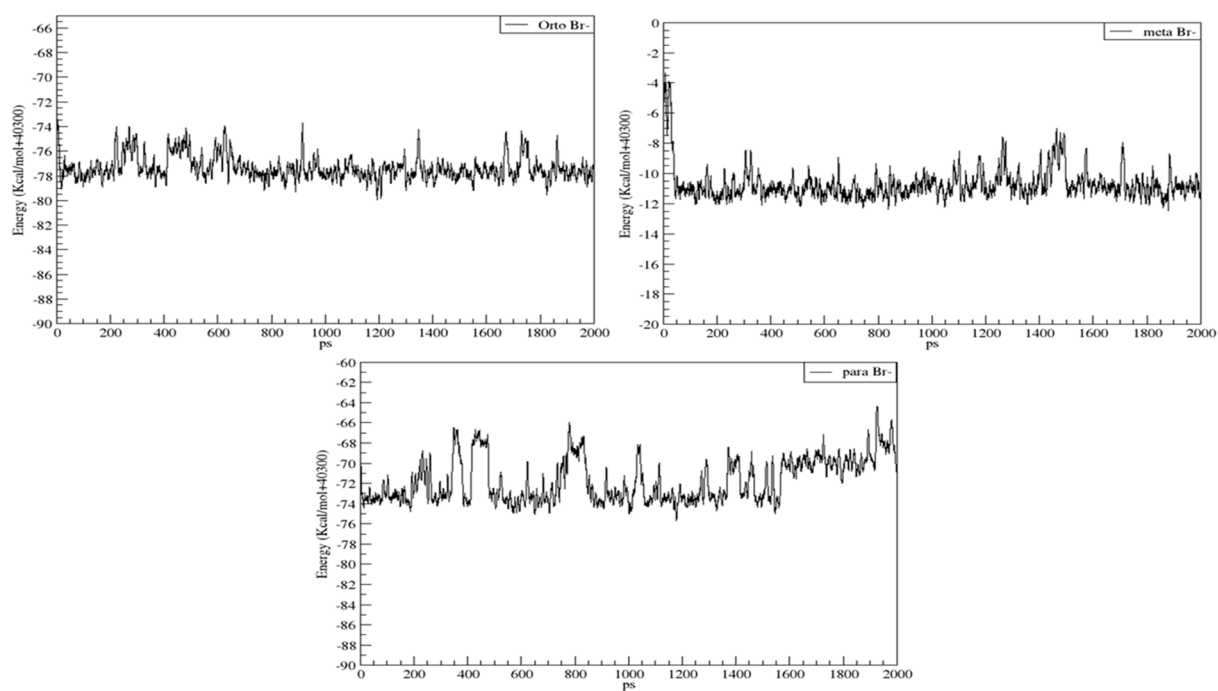

**Figure S27:** Energy variation along the simulation time to the IL using the Bromide anion (Conformations Ortho, Meta and Para).

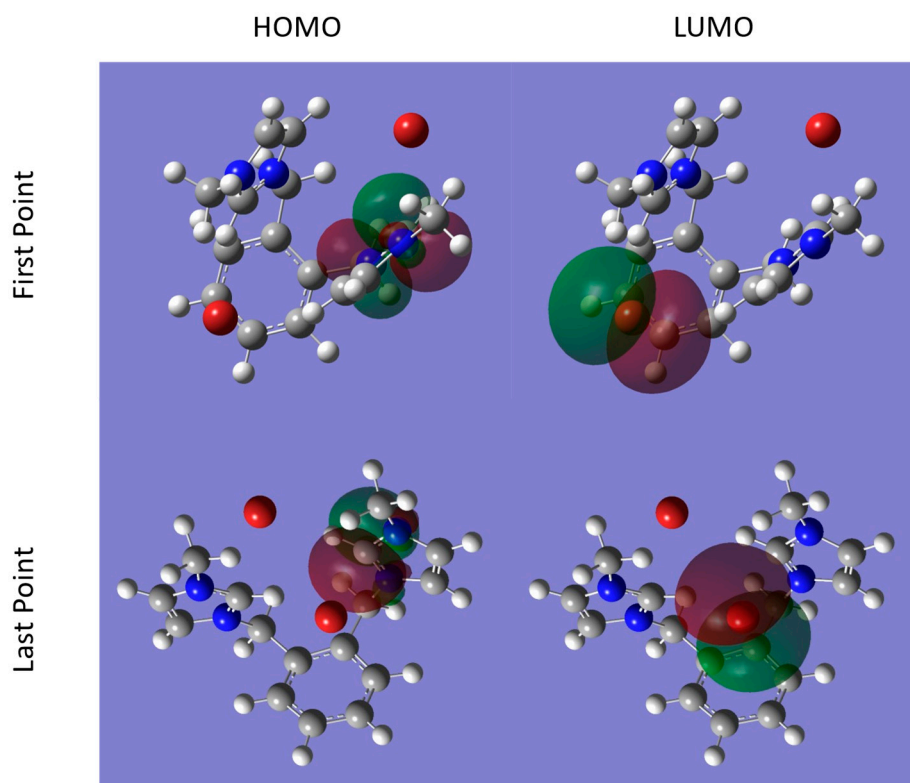

**Figure S28:** HOMO-LUMO analyses for the IL with bromide anion in the configuration ortho.

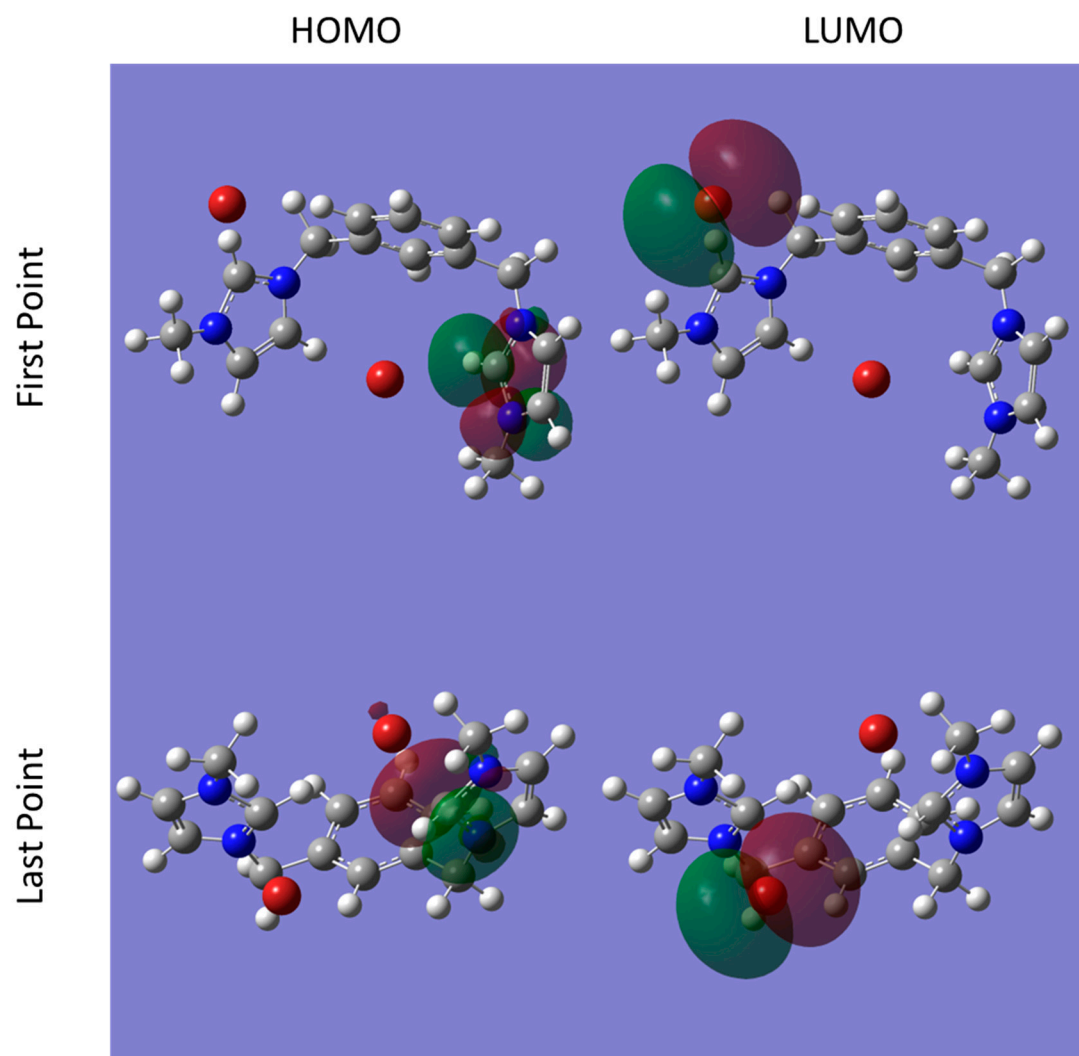

**Figure S29:** HOMO-LUMO analyses for the IL with bromide anion in the configuration meta.



First Point

Last Point

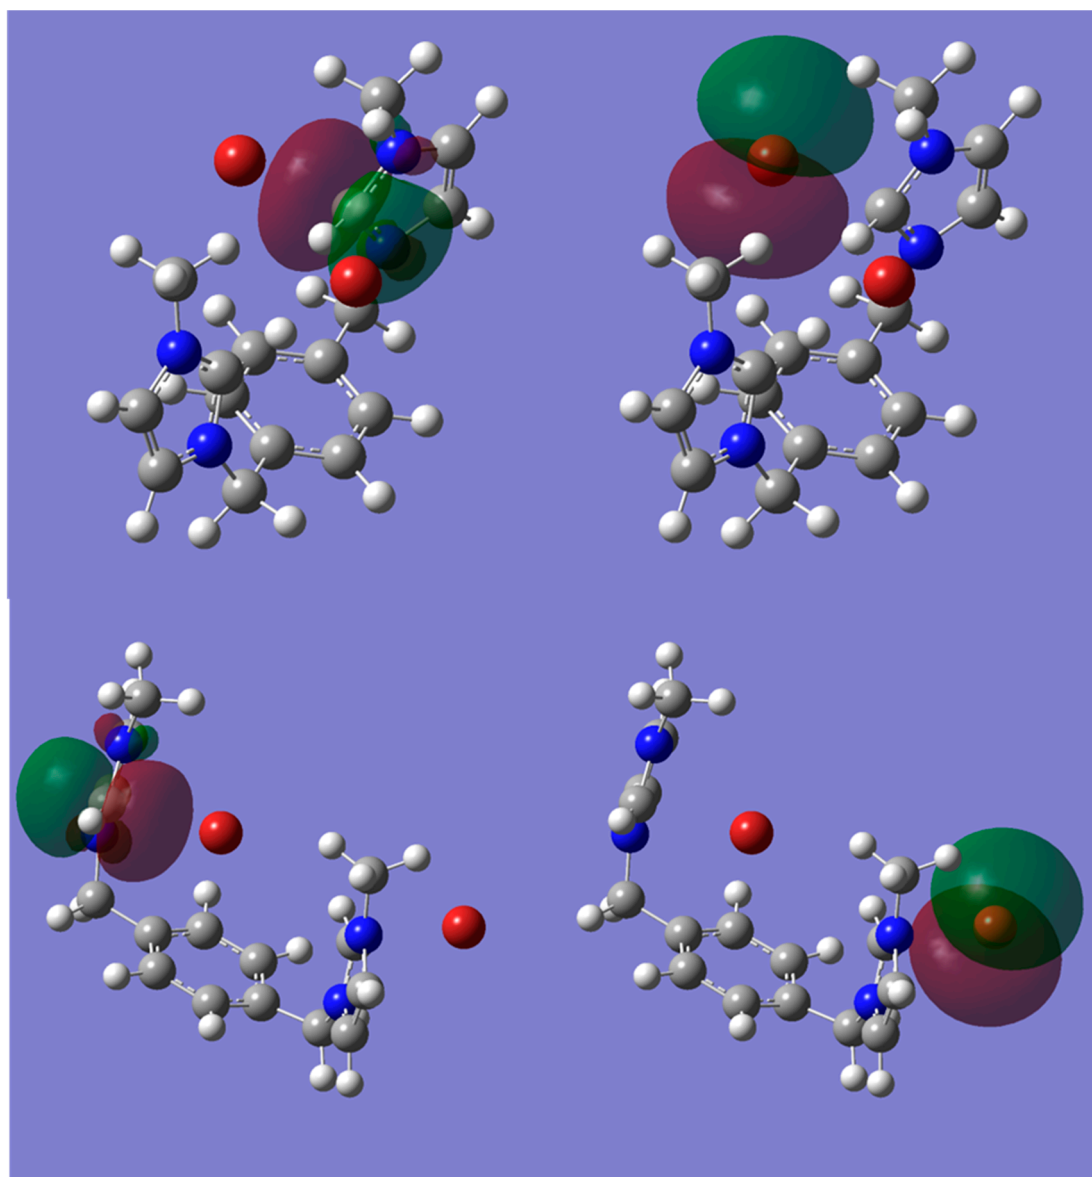

**Figure S30:** HOMO-LUMO analyses for the IL with bromide anion in the configuration para.

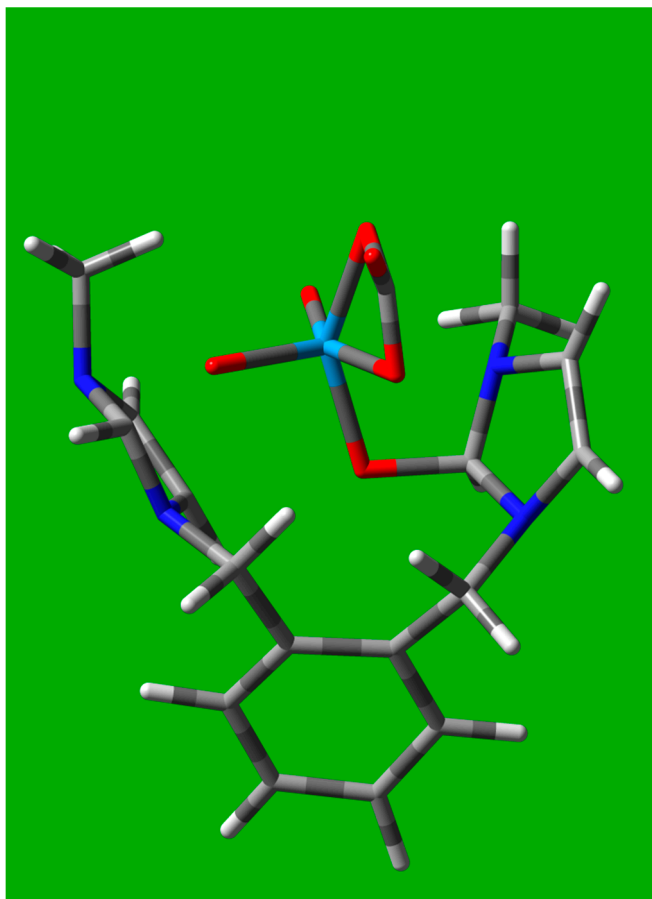

**Figure S31.** Structure of cluster with CO<sub>2</sub>. Ortho configuration.

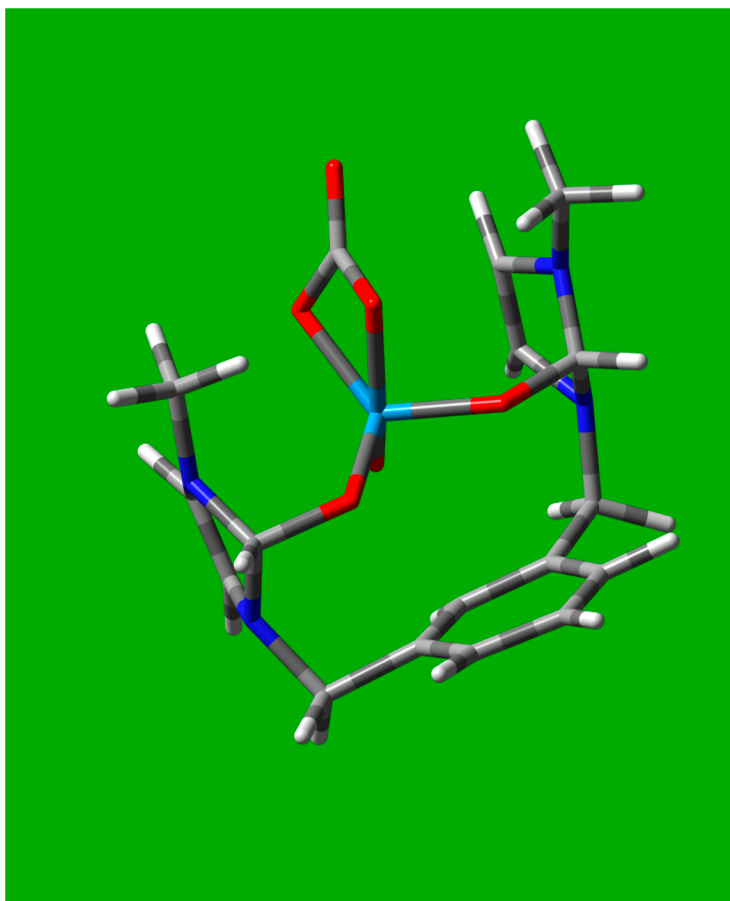

**Figure S32.** Structure of cluster with CO<sub>2</sub>. Meta configuration.

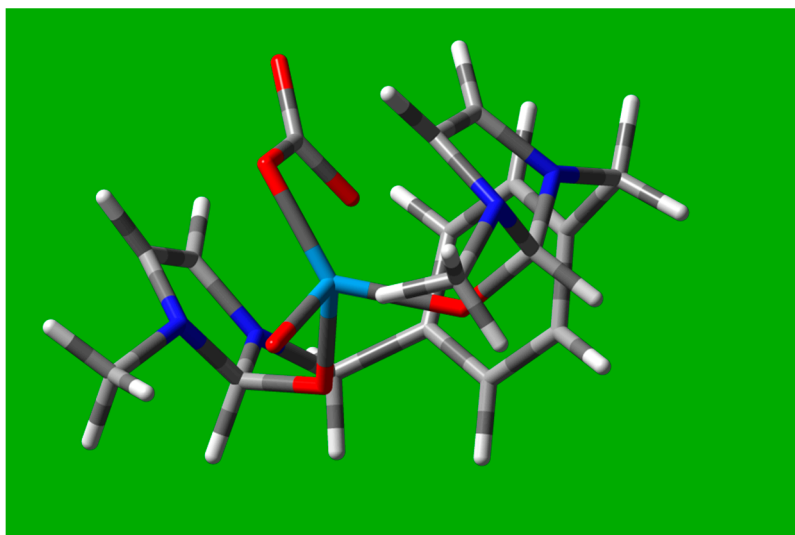

**Figure S33.** Structure of cluster with CO<sub>2</sub>. Para configuration.
